| Category                               | Reason                         | Norway Spruce |            | Rowan |            | Interspecific differences |
|----------------------------------------|--------------------------------|---------------|------------|-------|------------|---------------------------|
|                                        |                                | No.           | % of total | No.   | % of total | $\chi^2$ value (p -value) |
| Survived trees (> 200 cm )             |                                | 161           |            | 3     |            |                           |
| Killed trees (> 200 cm)                | <i>bark beetle/windthrow</i>   | 421           |            | 1     |            |                           |
| Pre-disturbance saplings (50 – 200 cm) | Survived undamaged             | 1886          | 87.7%      | 147   | 29.7%      | 285.0 ( $\leq 0.001$ )    |
|                                        | Survived damaged total         | 168           | 7.8%       | 343   | 69.3%      | 346.4 ( $\leq 0.001$ )    |
|                                        | <i>bark beetle attack</i>      | 13            | 0.6%       | 0     | 0.0%       | (-)                       |
|                                        | <i>another death tree fall</i> | 8             | 0.4%       | 0     | 0.0%       | (-)                       |
|                                        | <i>an. windthrow tree fall</i> | 59            | 2.7%       | 5     | 1.0%       | 81.3 ( $\leq 0.001$ )     |
|                                        | uprooting from deadwood        | 7             | 0.3%       | 0     | 0.0%       | (-)                       |
|                                        | other (snow, etc.)             | 77            | 3.6%       | 12    | 2.4%       | 88.1 ( $p \leq 0.001$ )   |
|                                        | browsing and bark stripping    | 4             | 0.2%       | 326   | 65.9%      | 124.2 ( $p \leq 0.001$ )  |
|                                        | Killed total                   | 96            | 4.5%       | 5     | 1.0%       | 21.6 ( $p \leq 0.001$ )   |
|                                        | <i>bark beetle attack</i>      | 9             | 0.4%       | 0     | 0.0%       | (-)                       |
|                                        | <i>another death tree fall</i> | 3             | 0.1%       | 0     | 0.0%       | (-)                       |
|                                        | <i>an. windthrow tree fall</i> | 65            | 3.0%       | 5     | 1.0%       | (-)                       |
|                                        | uprooting from deadwood        | 3             | 0.1%       | 0     | 0.0%       | (-)                       |
|                                        | competition                    | 10            | 0.5%       | 0     | 0.0%       | (-)                       |
|                                        | other (snow, etc.)             | 3             | 0.1%       | 0     | 0.0%       | (-)                       |
|                                        | browsing and bark stripping    | 3             | 0.1%       | 0     | 0.0%       | (-)                       |
|                                        | Total pre-disturbance saplings | 2414          | 100.0%     | 843   | 100.0%     |                           |

**S2 Table. Tree and regeneration density before and after disturbance.** The number (total for both plots) of survived undamaged, survived damaged, and dead spruce and rowan individuals by height classes (50–200 cm, > 200 cm) four years after the wind and bark beetle disturbance. Disturbance-related causes are in italics. The sign (-) means that  $\chi^2$  approximation of interspecific differences would be incorrect because the number of expected values is too low.
