# Supplementary material for: Legacy of Pre-Disturbance Spatial Pattern Determines Early Structural Diversity following Severe Disturbance in Montane Spruce Forests
Source: PLOS journal article supplement (doi:10.1371/journal.pone.0139214), 2015-09-30
Supplement: S4 (10.1371/journal.pone.0139214.s004) [file redirect.do]

| Independent variables                 | Definition/Methods                                                                                                                                                |
|---------------------------------------|-------------------------------------------------------------------------------------------------------------------------------------------------------------------|
| Canopy cover per grid cell            | Defined as 100% minus the area without crown projection                                                                                                           |
| Alpine-lady fern cover per grid cell  | The cover (dominance) was estimated. Values were recorded to the nearest 5%.                                                                                      |
| Distance to the closest down log      | The perpendicular distance to the closest longitudinal axis of a down log                                                                                         |
| Side vegetation cover along down logs | The vegetation growing along a log and/or rising over the log): (1) up to 5% of the log covered; (2) 6 to 25% covered; (3) 26 to 50% covered and (4) >50% covered |
| <b>Supplementary variables in PCA</b> |                                                                                                                                                                   |
| Density                               | Sapling density. Trees under 200 cm per ha                                                                                                                        |
| Height homogeneity                    | Pearson's measure of kurtosis of sapling height distribution                                                                                                      |
| Height heterogeneity                  | Interquartile range of sapling height distribution                                                                                                                |
| Canopy                                | Canopy cover per grid cell                                                                                                                                        |
| Fern                                  | Alpine-lady fern cover per grid cell                                                                                                                              |

**S1 Table. List of independent and supplementary variables used in PCA.**
